# Supplementary material
Source: Springer Nature journal article supplement (https://www.springermedizin.de/resource/supplementary/12986_2010_277_MOESM3_ESM.pdf/25655740)

**3a**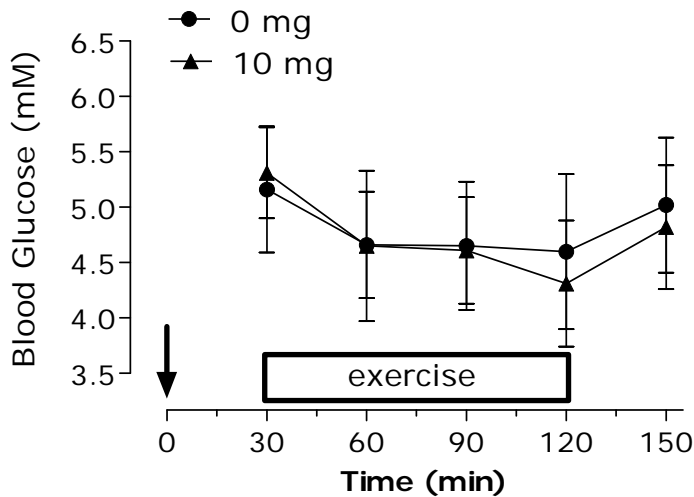**3b**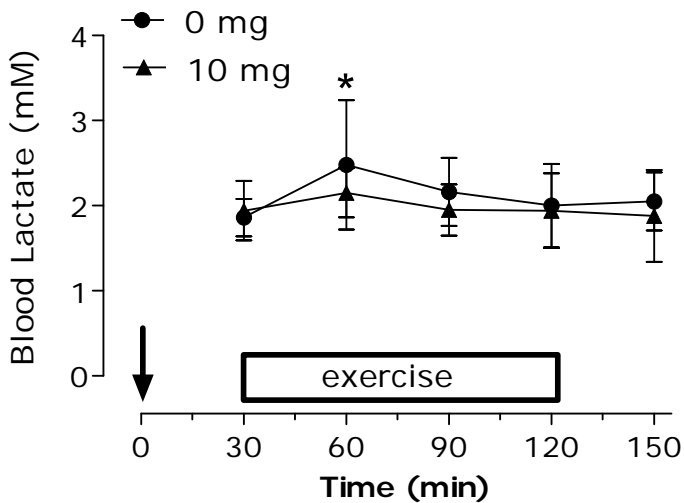

Supplement: MOESM3 [file 25655740]
